# Supplementary material for: Microbiota That Affect Risk for Shigellosis in Children in Low-Income Countries
Source: PubMed Central journal article supplement (PMC4313639; doi:10.3201/eid2101.140795), 2015-02
Supplement: 14-0795-Techapp-s1.pdf [file 14-0795-Techapp-s1.pdf]

# Microbiota that Affect Risk for Shigellosis in Children in Low-Income Countries

## Technical Appendix

### Supplementary information regarding microbiota tested for their effects on risk for shigellosis in children in low-income countries

**Technical Appendix Table 1.** Association between pathogens and levels of *Shigella* spp./EIEC *ipaH* gene in children with diarrhea and controls in low-income countries\*

| Pathogens                   | High level, no. (%) | Low level, no. (%) | OR (95% CI)      | p value                 |
|-----------------------------|---------------------|--------------------|------------------|-------------------------|
| <b>Cases</b>                |                     |                    |                  |                         |
| Rotavirus                   | 14 (8)              | 169 (17)           | 0.31 (0.17–0.55) | 1.06 × 10 <sup>-6</sup> |
| Norovirus GI or GII         | 32 (12)             | 95 (9)             | 1.41 (0.91–2.18) | 0.12                    |
| <i>Giardia lamblia</i>      | 43 (16)             | 187 (18)           | 0.69 (0.47–1.00) | 0.05                    |
| <i>Cryptosporidium</i> spp. | 24 (9)              | 118 (12)           | 0.84 (0.53–1.34) | 0.46                    |
| tEPEC                       | 27 (10)             | 92 (9)             | 1.15 (0.71–1.86) | 0.58                    |
| EAEC                        | 58 (21)             | 195 (19)           | 1.37 (0.97–1.93) | 0.07                    |
| EPEC                        | 32 (12)             | 149 (15)           | 0.85 (0.56–1.30) | 0.46                    |
| <i>Campylobacter jejuni</i> | 68 (24)             | 273 (27)           | 1.01 (0.74–1.38) | 0.94                    |
| <b>Controls</b>             |                     |                    |                  |                         |
| Rotavirus                   | 1 (1)               | 40 (2)             | 0.31 (0.04–2.33) | 0.26                    |
| Norovirus GI or GII         | 13 (10)             | 128 (8)            | 1.34 (0.73–2.45) | 0.34                    |
| <i>G. lamblia</i>           | 25 (20)             | 348 (22)           | 0.81 (0.51–1.29) | 0.38                    |
| <i>Cryptosporidium</i> spp. | 9 (7)               | 78 (5)             | 1.52 (0.74–3.11) | 0.25                    |
| tEPEC                       | 11 (9)              | 107 (7)            | 1.13 (0.53–2.39) | 0.75                    |
| EAEC                        | 27 (21)             | 320 (20)           | 1.13 (0.72–1.77) | 0.60                    |
| EPEC                        | 11 (9)              | 137 (9)            | 1.01 (0.53–1.93) | 0.97                    |
| <i>C. jejuni</i>            | 21 (16)             | 243 (15)           | 1.15 (0.07–1.89) | 0.58                    |

\*OR, odds ratio; tEPEC, typical enteropathogenic *Escherichia coli*; EAEC, enteroaggregative *E. coli*; EPEC, enterotoxigenic *E. coli*.

**Technical Appendix Table 2.** Interaction between levels of *ipaH* gene and *Lactobacillus* and *Veillonella* taxa identified by 16S rRNA gene sequencing and association with moderate-to-severe diarrhea in children in low-income countries\*

| Organism                         | RERI (95% CI)                 | RERI p value | Multiplicative p value |
|----------------------------------|-------------------------------|--------------|------------------------|
| <i>Lactobacillus</i> DJF RP24    | <b>-2.44 (-3.93 to -0.95)</b> | <b>0.001</b> | 0.005                  |
| <i>Lactobacillus</i> KLDS 1.0718 | <b>-1.93 (-3.56 to -0.29)</b> | <b>0.02</b>  | 0.01                   |
| <i>Lactobacillus</i> TSK G32.2   | <b>-2.69 (-4.55 to -0.84)</b> | <b>0.004</b> | 0.02                   |
| <i>Lactobacillus salivarius</i>  | -1.02 (-3.18 to 1.14)         | 0.36         | 0.03                   |
| <i>Lactobacillus ruminis</i>     | <b>-1.92 (-3.36 to -0.47)</b> | <b>0.009</b> | 0.05                   |
| <i>Veillonella</i> R54           | -1.73 (-3.48 to 0.03)         | 0.05         | 0.06                   |
| <i>Lactobacillus</i> KLDS 1.0713 | -2.06 (-4.59 to 0.48)         | 0.11         | 0.06                   |
| <i>Veillonella</i> BP2.87        | 1.12 (-0.38 to 2.62)          | 0.14         | 0.06                   |
| <i>Lactobacillus gastricus</i>   | -1.46 (-4.07 to 1.16)         | 0.27         | 0.08                   |
| <i>Lactobacillus fermentum</i>   | -0.61 (-2.83 to 1.62)         | 0.59         | 0.08                   |
| <i>Veillonella</i> BP1.85        | 1.78 (-0.09 to 3.65)          | 0.06         | 0.09                   |
| <i>Lactobacillus gasseri</i>     | -1.10 (-2.96 to 0.76)         | 0.24         | 0.10                   |
| <i>Lactobacillus vaginalis</i>   | -1.12 (-3.08 to 1.47)         | 0.40         | 0.21                   |
| <i>Veillonella</i> AA050         | 0.84 (-0.65 to 2.34)          | 0.27         | 0.21                   |
| <i>Lactobacillus mucosae</i>     | -0.74 (-2.48 to 1.00)         | 0.40         | 0.31                   |
| <i>Veillonella</i> HB016         | 11.19 (-8.17 to 30.55)        | 0.26         | 0.34                   |
| <i>Veillonella dispar</i>        | 0.76 (-0.80 to 2.32)          | 0.34         | 0.42                   |

| Organism                       | RERI (95% CI)         | RERI p value | Multiplicative p value |
|--------------------------------|-----------------------|--------------|------------------------|
| <i>Veillonella ratti</i>       | -0.44 (-1.87 to 0.98) | 0.54         | 0.50                   |
| <i>Lactobacillus oris</i>      | -0.25 (-3.83 to 3.32) | 0.89         | 0.55                   |
| <i>Veillonella</i> BP2.30      | -0.64 (-4.46 to 3.18) | 0.74         | 0.58                   |
| <i>Veillonella</i> MB5.P17     | 1.15 (-2.31 to 4.63)  | 0.51         | 0.65                   |
| <i>Veillonella</i> B9          | 0.35 (-2.79 to 3.50)  | 0.83         | 0.69                   |
| <i>Veillonella</i> R57         | -0.51 (-2.64 to 1.62) | 0.64         | 0.71                   |
| <i>Veillonella</i> F12         | 0.14 (-4.95 to 5.24)  | 0.96         | 0.75                   |
| <i>Veillonella</i> atypical    | -0.08 (-1.93 to 1.77) | 0.94         | 0.78                   |
| <i>Veillonella</i> BP2.47      | 0.06 (-1.07 to 1.82)  | 0.94         | 0.79                   |
| <i>Veillonella</i> E4          | 0.33 (-3.10 to 3.77)  | 0.85         | 0.80                   |
| <i>Veillonella parvula</i>     | -0.13 (-2.04 to 1.78) | 0.89         | 0.80                   |
| <i>Veillonella</i> ASCG02      | -0.65 (-2.10 to 0.80) | 0.38         | 0.89                   |
| <i>Lactobacillus crispatus</i> | -0.36 (-3.34 to 2.62) | 0.81         | 0.97                   |
| <i>Veillonella</i> C8          | 1.19 (-2.98 to 5.36)  | 0.58         | 0.97                   |

\*RERI, relative excess risk caused by the interaction. The multiplicative p value was estimated by using a logistic regression model with an interaction term between high level of *ipaH* and bacterial taxa and represents significance testing for departure for multiplicativity. The RERI p value represents significance testing for departure from additivity. Values in bold are statistically significant.

**Technical Appendix Table 3.** Interactions between levels of *ipaH* gene and 4 taxa of *Lactobacillus* and risk for moderate-to-severe diarrhea in children in low-income countries\*

| Characteristic                                                        | Low level of <i>ipaH</i>     |                  | High level of <i>ipaH</i>    |                  | OR (95% CI)                                                              |
|-----------------------------------------------------------------------|------------------------------|------------------|------------------------------|------------------|--------------------------------------------------------------------------|
|                                                                       | No. with MSD/no. without MSD | OR (95% CI)      | No. with MSD/no. without MSD | OR (95% CI)      | For high level of <i>ipaH</i> within strata of <i>Lactobacillus</i> spp. |
| <i>Lactobacillus ruminis</i>                                          |                              |                  |                              |                  |                                                                          |
| Negative                                                              | 609/894                      | 1.00 (Reference) | 190/69                       | 4.30 (3.19–5.80) | 4.35 (3.23–5.86)                                                         |
| Positive                                                              | 414/714                      | 0.82 (0.69–0.96) | 87/58                        | 2.20 (1.55–3.12) | 2.72 (1.90–3.89)                                                         |
| OR (95% CI) for <i>L. ruminis</i> within strata of <i>ipaH</i> status | NA                           | 0.82 (0.69–0.96) | NA                           | 0.51 (0.33–0.79) | Expected additive = 2.94                                                 |
| <i>Lactobacillus</i> DJF RP24                                         |                              |                  |                              |                  |                                                                          |
| Negative                                                              | 631/944                      | 1.00 (Reference) | 201/69                       | 4.58 (3.41–6.15) | 4.63 (3.45–6.22)                                                         |
| Positive                                                              | 392/664                      | 0.85 (0.72–0.99) | 76/58                        | 1.99 (1.39–2.85) | 2.38 (1.65–3.44)                                                         |
| OR (95% CI) for DJF RP24 within strata of <i>ipaH</i> status          | NA                           | 0.85 (0.72–0.99) | NA                           | 0.43 (0.29–0.68) | Expected additive = 5.47                                                 |
| <i>Lactobacillus</i> KLDS 1.0718                                      |                              |                  |                              |                  |                                                                          |
| Negative                                                              | 834/1,364                    | 1.00 (Reference) | 243/103                      | 4.10 (3.19–5.26) | 4.10 (3.19–5.26)                                                         |
| Positive                                                              | 189/244                      | 1.25 (1.01–1.55) | 34/24                        | 2.42 (1.42–4.13) | 2.10 (1.18–3.77)                                                         |
| OR (95% CI) for KLDS 1.0718 within strata of <i>ipaH</i> status       |                              | 1.25 (1.01–1.55) |                              | 0.62 (0.35–1.12) | Expected additive = 4.35                                                 |
| <i>Lactobacillus</i> TSK G32.2                                        |                              |                  |                              |                  |                                                                          |
| Negative                                                              | 912/1,489                    | 1.00 (Reference) | 269/119                      | 3.89 (3.08–4.92) | 3.85 (3.05–4.88)                                                         |
| Positive                                                              | 111/119                      | 1.40 (1.07–1.85) | 8/8                          | 1.60 (0.59–4.30) | 1.62 (0.54–4.96)                                                         |
| OR (95% CI) for TSK G32.2 within strata of <i>ipaH</i> status         | NA                           | 1.37 (1.04–1.81) | NA                           | 0.46 (0.16–1.29) | Expected additive = 4.29                                                 |

\*MSD, moderate-to-severe diarrhea; OR, odds ratio; NA, not applicable.

**Technical Appendix Table 4.** Interactions between 4 taxa of *Lactobacillus* and pathogens and risk for moderate-to-severe diarrhea in children in low-income countries\*

| Taxa and pathogen                | RERI (95% CI)         | RERI p value | Multiplicative p value |
|----------------------------------|-----------------------|--------------|------------------------|
| <i>Lactobacillus ruminis</i>     |                       |              |                        |
| Rotavirus                        | 1.78 (-2.48 to 6.05)  | 0.41         | 0.12                   |
| Norovirus GI or GII              | -0.38 (-0.93 to 0.16) | 0.17         | 0.19                   |
| <i>Giardia lamblia</i>           | 0.02 (-0.25 to 0.29)  | 0.90         | 0.84                   |
| <i>Cryptosporidium</i> spp.      | -0.37 (-1.58 to 0.81) | 0.53         | 0.99                   |
| tEPEC                            | 0.12 (-0.51 to 0.75)  | 0.71         | 0.52                   |
| EAEC                             | -0.10 (-0.40 to 0.20) | 0.51         | 0.40                   |
| EPEC                             | -0.45 (-1.14 to 0.23) | 0.19         | 0.39                   |
| <i>Campylobacter jejuni</i>      | 0.19 (-0.35 to 0.73)  | 0.49         | 0.10                   |
| <i>Lactobacillus</i> DJF RP241   |                       |              |                        |
| Rotavirus                        | 2.74 (-1.84 to 7.32)  | 0.24         | 0.04                   |
| Norovirus GI or GII              | -0.08 (-0.61 to 0.44) | 0.76         | 0.87                   |
| <i>G. lamblia</i>                | -0.07 (-0.34 to 0.21) | 0.64         | 0.40                   |
| <i>Cryptosporidium</i> spp.      | -1.02 (-2.30 to 0.26) | 0.12         | 0.27                   |
| tEPEC                            | -0.17 (-0.81 to 0.48) | 0.61         | 0.81                   |
| EAEC                             | 0.15 (-0.14 to 0.45)  | 0.30         | 0.39                   |
| EPEC                             | -0.21 (-0.86 to 0.45) | 0.54         | 0.90                   |
| <i>C. jejuni</i>                 | 0.06 (-0.50 to 0.62)  | 0.83         | 0.27                   |
| <i>Lactobacillus</i> KLDS 1.0718 |                       |              |                        |
| Rotavirus                        | 7.28 (-5.19 to 19.75) | 0.25         | 0.15                   |
| Norovirus GI or GII              | -0.16 (-0.97 to 0.65) | 0.69         | 0.66                   |
| <i>G. lamblia</i>                | 0.15 (-0.38 to 0.68)  | 0.59         | 0.48                   |
| <i>Cryptosporidium</i> spp.      | 0.64 (-1.20 to 2.48)  | 0.50         | 0.57                   |
| tEPEC                            | 0.15 (-0.91 to 1.20)  | 0.78         | 0.85                   |
| EAEC                             | -0.23 (-0.69 to 0.23) | 0.32         | 0.35                   |
| EPEC                             | 0.49 (-0.86 to 1.84)  | 0.48         | 0.53                   |
| <i>C. jejuni</i>                 | 0.26 (-0.55 to 1.08)  | 0.53         | 0.60                   |
| <i>Lactobacillus</i> TSK G32.2   |                       |              |                        |
| Rotavirus                        | †                     | †            | 0.94                   |
| Norovirus GI or GII              | 0.09 (-1.15 to 1.35)  | 0.88         | 0.92                   |
| <i>G. lamblia</i>                | -0.49 (-1.06 to 0.79) | 0.09         | 0.15                   |
| <i>Cryptosporidium</i> spp.      | 0.56 (-1.70 to 2.84)  | 0.62         | 0.72                   |
| tEPEC                            | 2.08 (-1.21 to 5.38)  | 0.21         | 0.08                   |
| EAEC                             | -0.11 (-0.77 to 0.55) | 0.74         | 0.78                   |
| EPEC                             | 0.16 (-1.26 to 1.58)  | 0.82         | 0.95                   |
| <i>C. jejuni</i>                 | 0.13 (-0.99 to 1.27)  | 0.82         | 0.99                   |

\*RERI, relative excess risk caused by the interaction; tEPEC, typical enteropathogenic *Escherichia coli*; EAEC, enteroaggregative *E. coli*; EPEC, enterotoxigenic *E. coli*.

†Did not compute because there were no *Lactobacillus* TSK G32.2/rotavirus-positive controls.

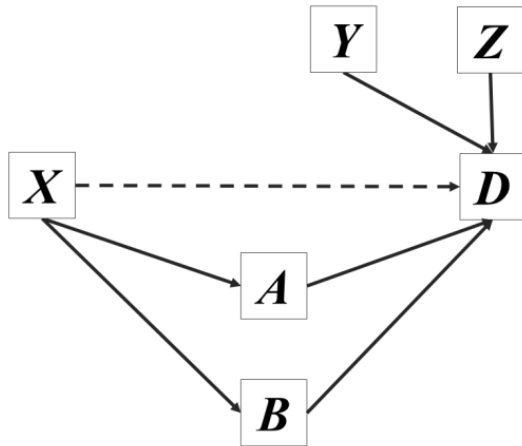

**Technical Appendix Figure.** Model diagram factors tested for their effects on risk for shigellosis in children in low-income countries. X, high level of *ipaH* gene; D, moderate-to-severe diarrhea; A, age; B, site; Y, co-occurring pathogen; Z, co-occurring microbial taxa.
